# Supplementary material for: A Web-Based Geodesign Tool for Evaluating the Integration of Transport Infrastructure, Public Spaces, and Human Activities
Source: MDPI journal article supplement (doi:10.3390/ijgi12120504), 2023-12-17
Supplement: s1 [file s1]

Archive with 1 entries (1 files):
- ijgi-2618846-supplementary.pdf
